# Supplementary material for: Targeted anatomical and functional identification of antinociceptive and pronociceptive serotonergic neurons that project to the spinal dorsal horn
Source: eLife journal article supplement (doi:10.7554/elife.78689), 2023-02-07
Supplement: supp [file elife-78689-supp-v1.zip]

Archive with 13 entries (13 files):
- elife_poa_e78689_Figure_1_figure_supplement_1.pdf
- elife_poa_e78689_Figure_1_figure_supplement_2.pdf
- elife_poa_e78689_Figure_1_figure_supplement_3.pdf
- elife_poa_e78689_Figure_1_figure_supplement_4.pdf
- elife_poa_e78689_Figure_3_figure_supplement_1.pdf
- elife_poa_e78689_Figure_5_figure_supplement_1.pdf
- elife_poa_e78689_Figure_5_figure_supplement_2.pdf
- elife_poa_e78689_Figure_5_figure_supplement_3.pdf
- elife_poa_e78689_Figure_5_figure_supplement_4.pdf
- elife_poa_e78689_Figure_5_figure_supplement_5.pdf
- elife_poa_e78689_Figure_6_figure_supplement_1.pdf
- elife_poa_e78689_Figure_6_figure_supplement_2.pdf
- elife_poa_e78689_Figure_6_figure_supplement_3.pdf
