# Supplementary material for: Targeted anatomical and functional identification of antinociceptive and pronociceptive serotonergic neurons that project to the spinal dorsal horn
Source: eLife journal article supplement (doi:10.7554/elife.78689), 2023-02-07

A

SAD.RabiesΔG.GFP (SAD-G)

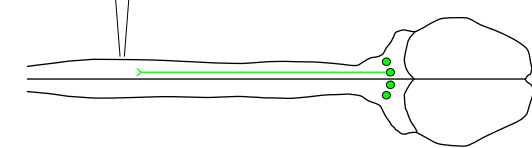

● GFP-expressing neuron

D

Helper virus + SAD.RabiesΔG.GFP(EnvA) (2 weeks later)

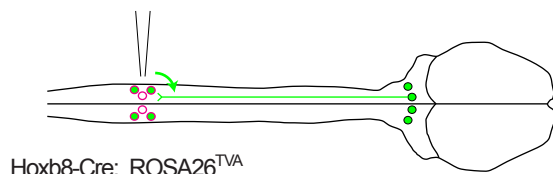

Hoxb8-Cre; ROSA26<sup>TVA</sup>

○ starter cell

● rabies-infected starter cell

● monosynaptically traced cell

B

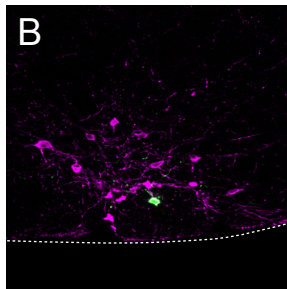

TPH2 GFP

LPGi

C

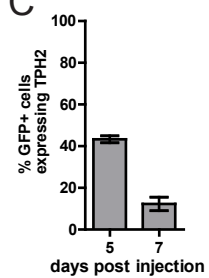

E

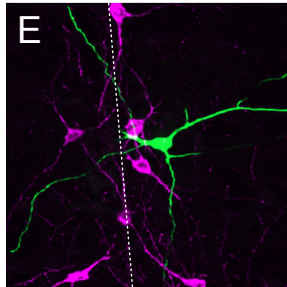

NRM

F

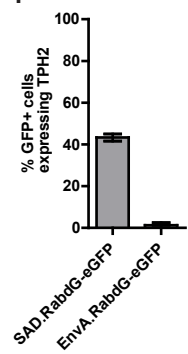

Supplement: supp [file elife-78689-supp-v1.zip › elife_poa_e78689_Figure_1_figure_supplement_4.pdf]
