# Supplementary figures and images for: Targeted anatomical and functional identification of antinociceptive and pronociceptive serotonergic neurons that project to the spinal dorsal horn
Source: eLife journal article supplement (doi:10.7554/elife.78689), 2023-02-07

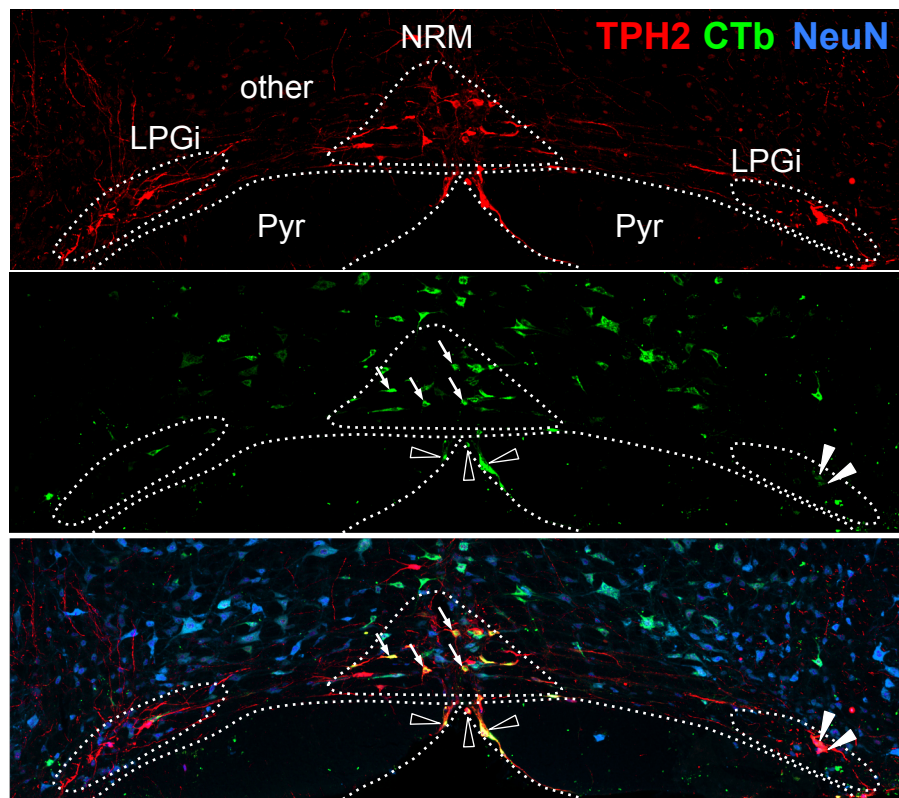

Supplement: supp [file elife-78689-supp-v1.zip › elife_poa_e78689_Figure_1_figure_supplement_1.pdf]

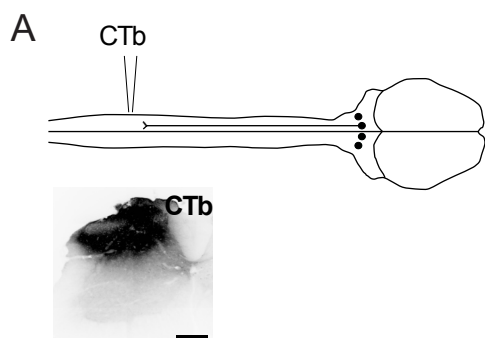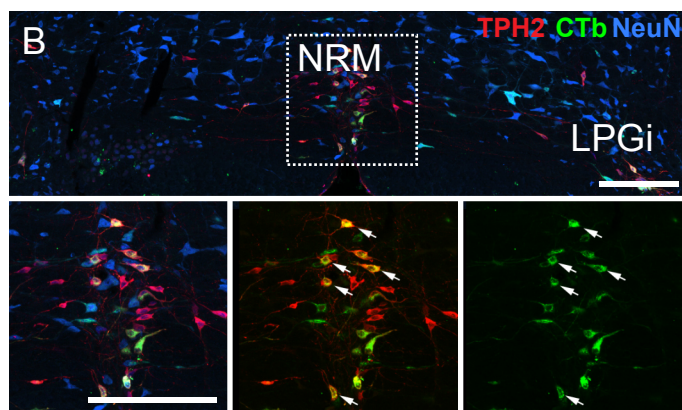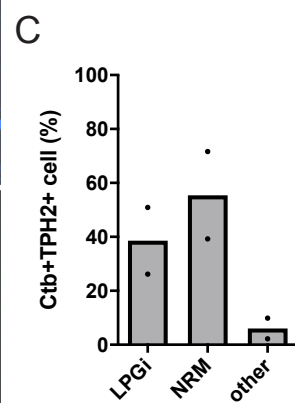

Supplement: supp [file elife-78689-supp-v1.zip › elife_poa_e78689_Figure_1_figure_supplement_2.pdf]

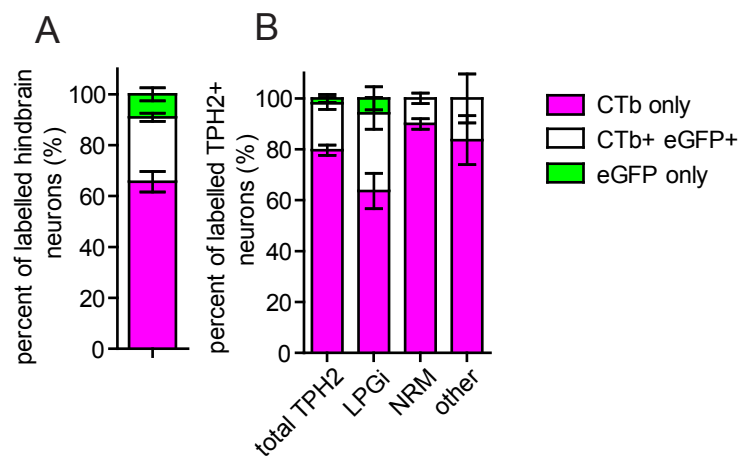

Supplement: supp [file elife-78689-supp-v1.zip › elife_poa_e78689_Figure_1_figure_supplement_3.pdf]

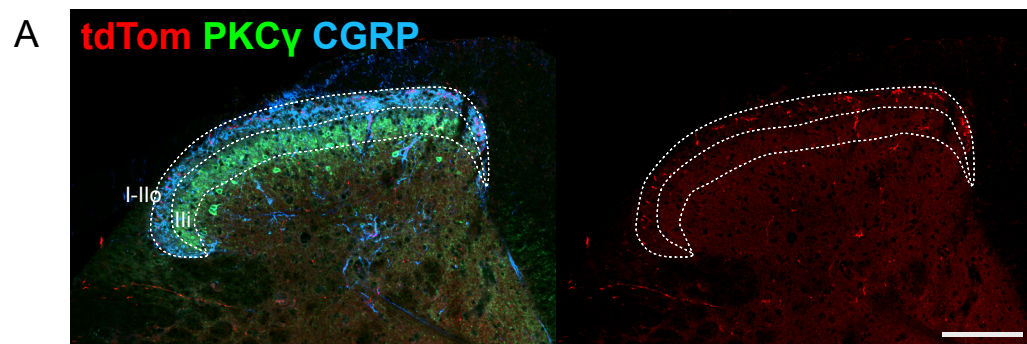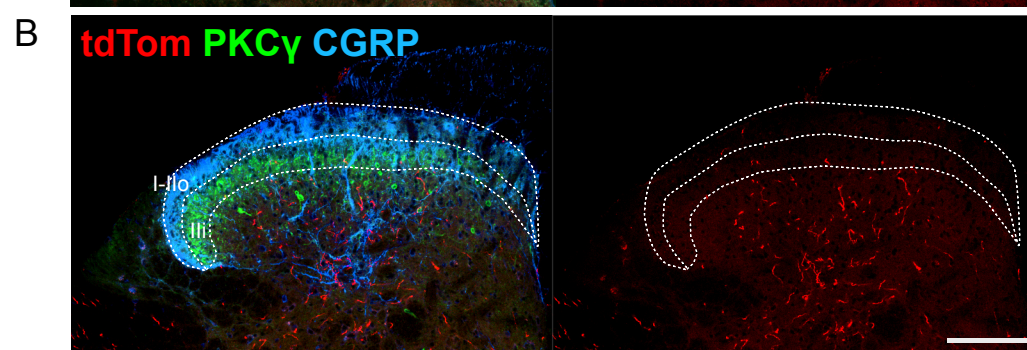

Supplement: supp [file elife-78689-supp-v1.zip › elife_poa_e78689_Figure_3_figure_supplement_1.pdf]

A

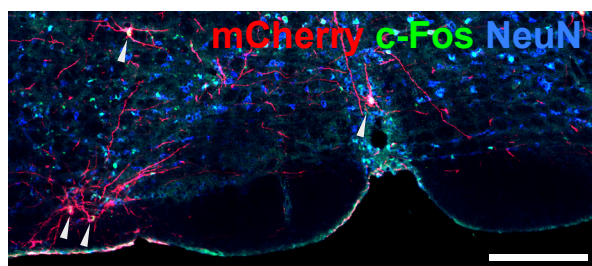

B

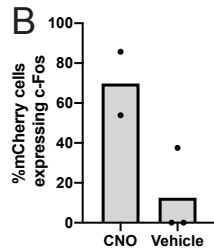

Supplement: supp [file elife-78689-supp-v1.zip › elife_poa_e78689_Figure_5_figure_supplement_1.pdf]

## CONTRA

Hargreaves 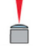

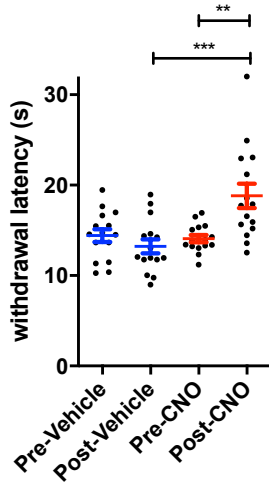

Cold plantar 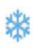

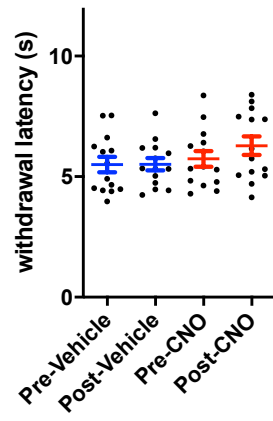

von Frey 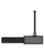

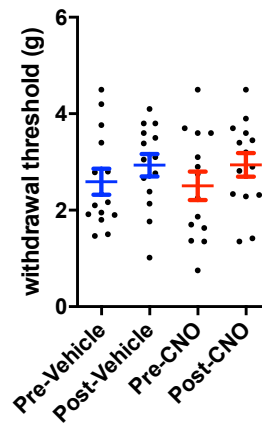

Supplement: supp [file elife-78689-supp-v1.zip › elife_poa_e78689_Figure_5_figure_supplement_2.pdf]

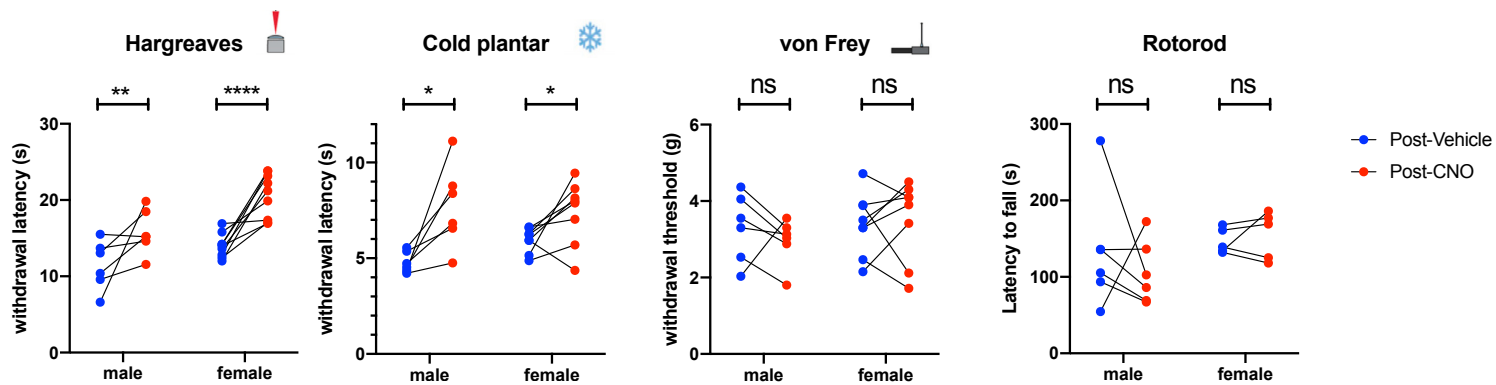

Supplement: supp [file elife-78689-supp-v1.zip › elife_poa_e78689_Figure_5_figure_supplement_3.pdf]

without hM3Dq

Hargreaves 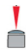 Cold plantar 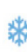 von Frey 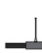 Rotorod

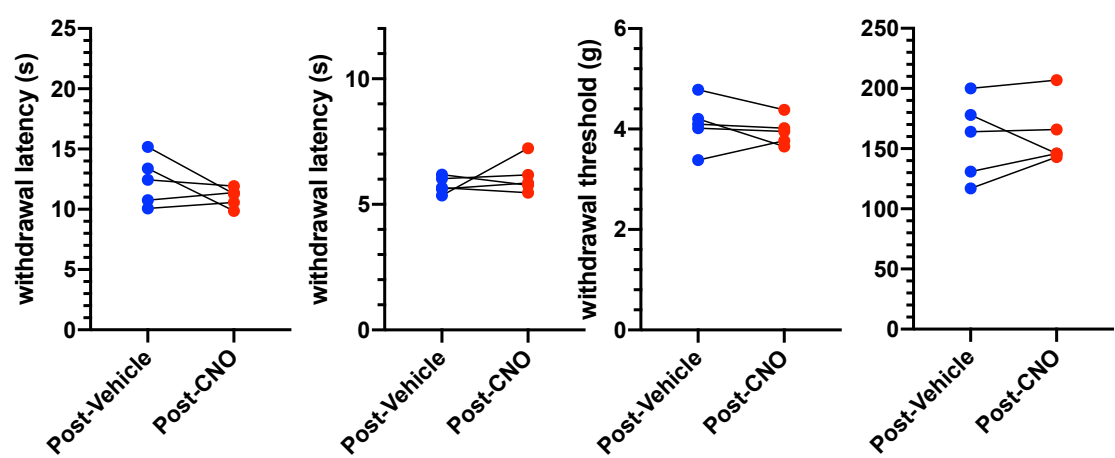

Supplement: supp [file elife-78689-supp-v1.zip › elife_poa_e78689_Figure_5_figure_supplement_4.pdf]

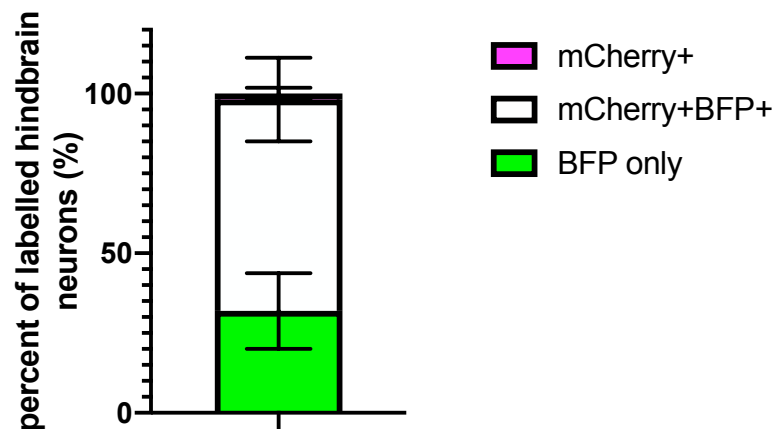

Supplement: supp [file elife-78689-supp-v1.zip › elife_poa_e78689_Figure_5_figure_supplement_5.pdf]

mCherry TPH2 NeuN

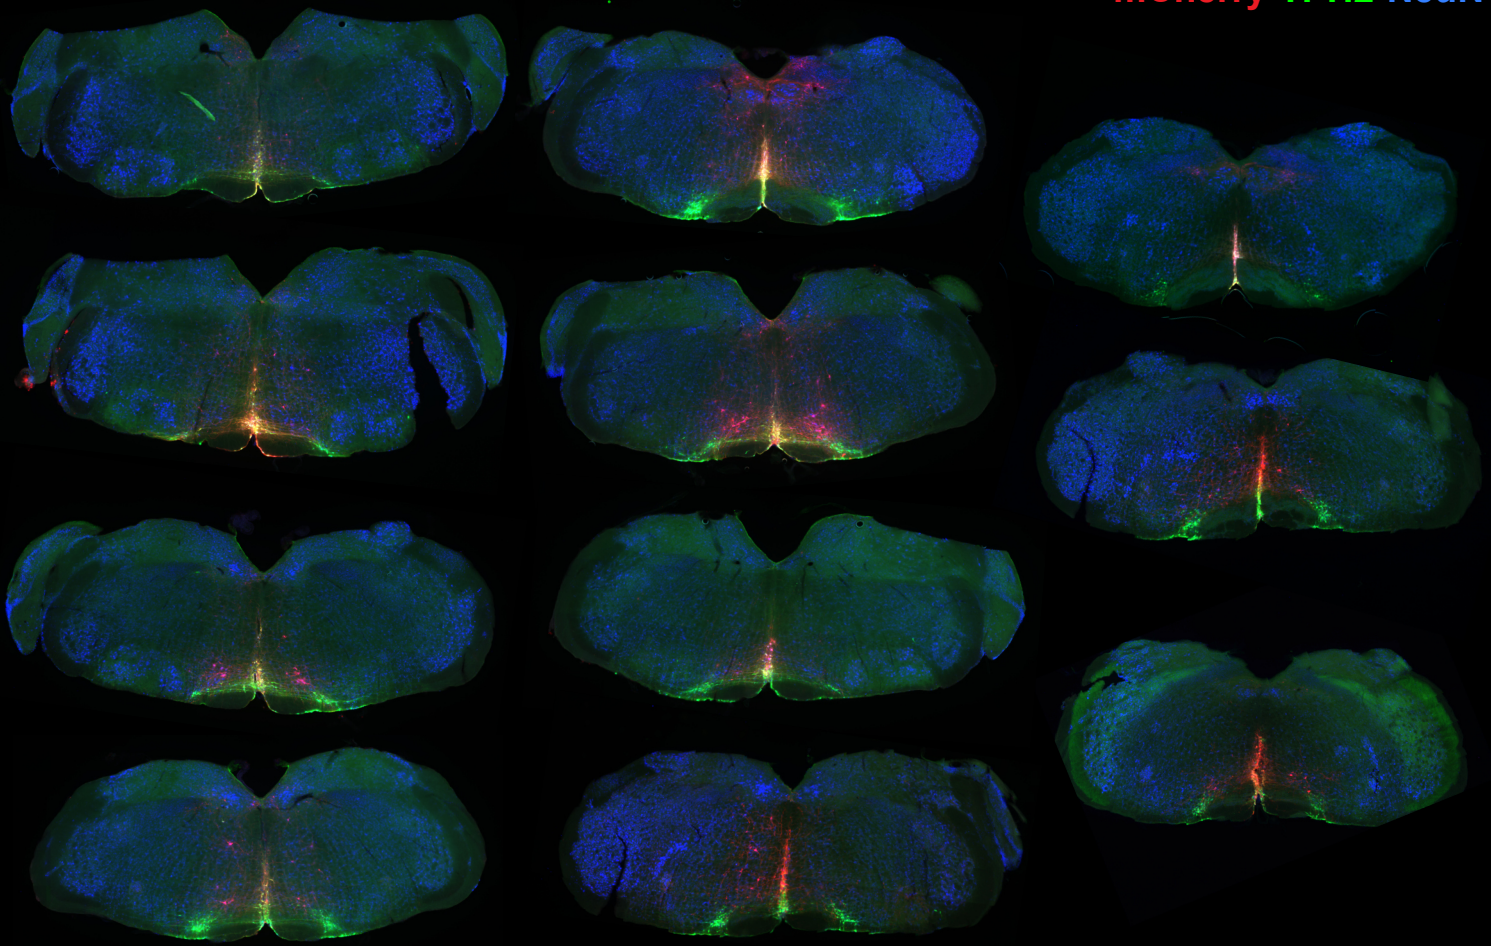

Supplement: supp [file elife-78689-supp-v1.zip › elife_poa_e78689_Figure_6_figure_supplement_1.pdf]

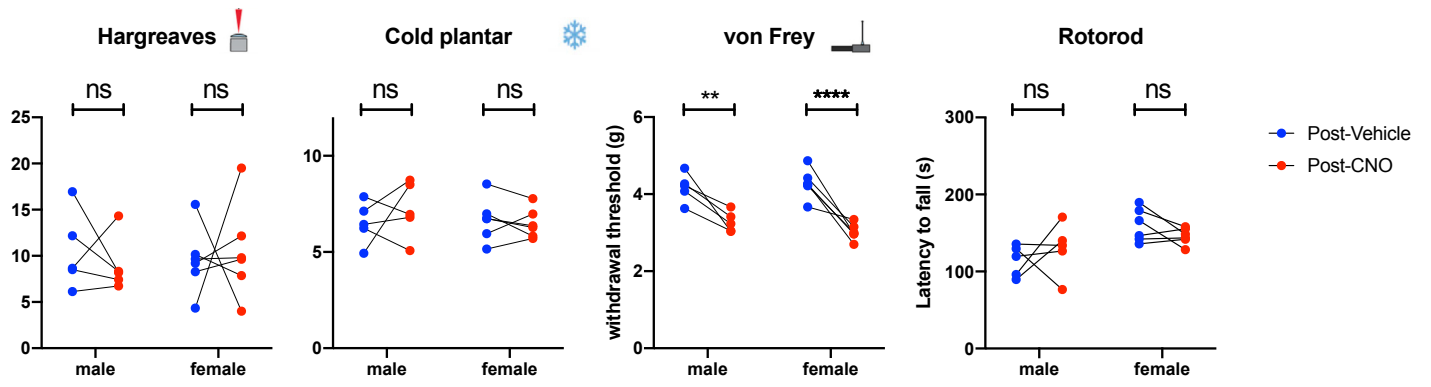

Supplement: supp [file elife-78689-supp-v1.zip › elife_poa_e78689_Figure_6_figure_supplement_2.pdf]

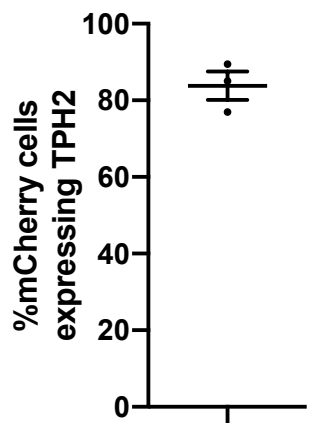

Supplement: supp [file elife-78689-supp-v1.zip › elife_poa_e78689_Figure_6_figure_supplement_3.pdf]
